# Supplementary material
Source: PubMed Central journal article supplement (PMC5602405)
Supplement: 10.1074_M117.775239_jbc.M117.775239-1.pdf [file 10.1074_M117.775239_jbc.M117.775239-1.pdf]

## Src Homology 2 Domain Containing Phosphotyrosine Phosphatase 2 (Shp2) Controls Surface GluA1 in Synaptic Homeostasis

Bin Zhang, Wen Lu

Figure S1

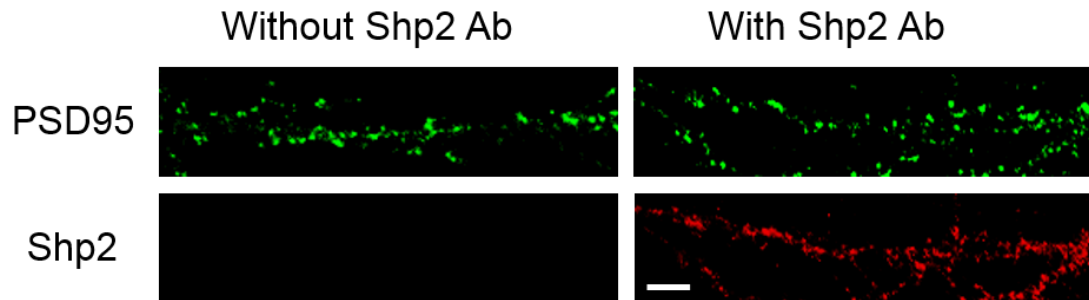

**Figure S1.** The secondary antibody control experiment. Cultured hippocampal neurons were firstly labeled with PSD95 antibody and with or without Shp2 antibody, then with appropriate secondary antibodies (for Shp2, donkey anti-rabbit Alexa-488-conjugated, A21206, Invitrogen, 1:500; for PSD95, Goat anti-mouse Alexa-546-conjugated, A11030, Invitrogen, 1:500). When labeled without Shp2 antibody, no signal was detected ( $n = 10$  cells). The experiment was performed for 3 independent cultures. Scale bar represents 5  $\mu\text{m}$ . Ab = antibody.
